# Supplementary material for: Folate–PEG functionalized silica CdTe quantum dots as fluorescent probes for cancer cell imaging
Source: Royal Society of Chemistry journal article supplement (doi:10.1039/c4nj00416g), 2014-01-01
Supplement: c4nj00416g1.pdf [file c4nj00416g1.pdf]

## Electronic Supplementary Material (ESI) for New Journal of Chemistry

### Supplementary material

#### **Folate-PEG functionalized silica CdTe quantum dots as fluorescent probes for cancer cell imaging**

Miao Lu<sup>a</sup>, Wendian Zhang<sup>a</sup>, Yongkang Gai<sup>a</sup>, Tan Yang<sup>a</sup>, Peng Ye<sup>b</sup>, Guang Yang<sup>c</sup>,  
Xiang Ma<sup>a,\*</sup> and Guangya Xiang<sup>a,\*</sup>

**Fig. S1** Synthesis of Folate-PEG-COOH

**Fig. S2** Molecular formula and <sup>1</sup>H-NMR spectra of Folate-PEG-COOH in D<sub>2</sub>O

**Fig. S3** Mass spectra of NH<sub>2</sub>-PEG-COOH (a) and Folate-PEG-COOH (b).

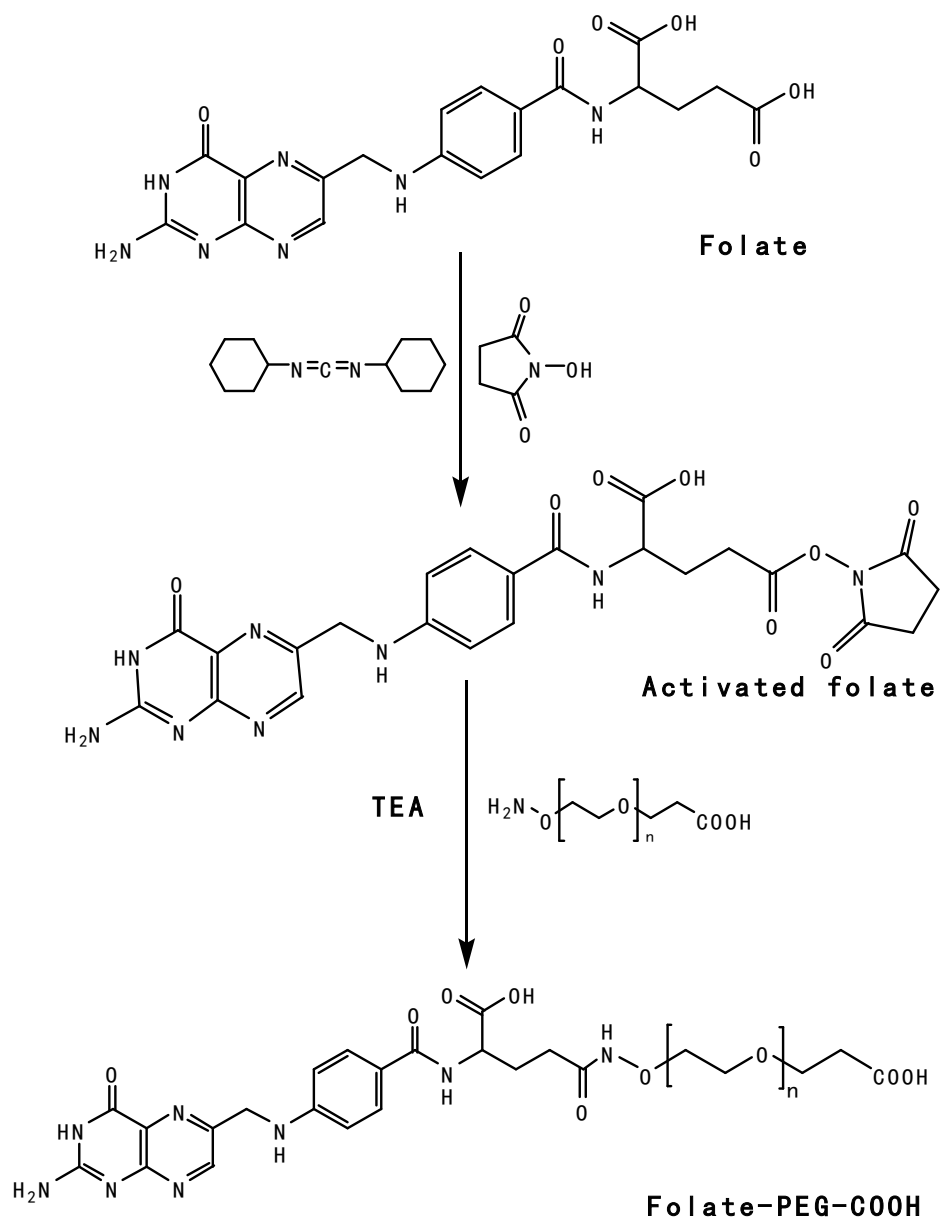

Fig.S1 Synthesis of Folate-PEG-COOH.

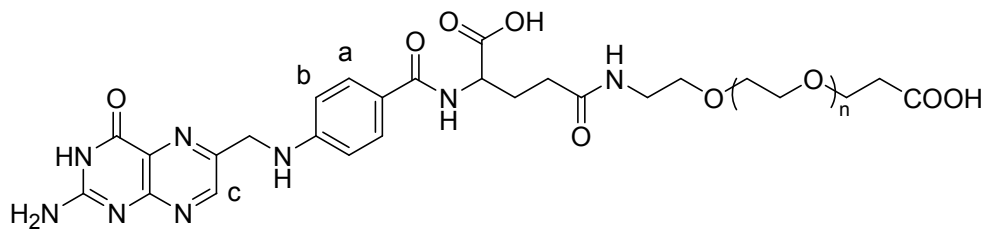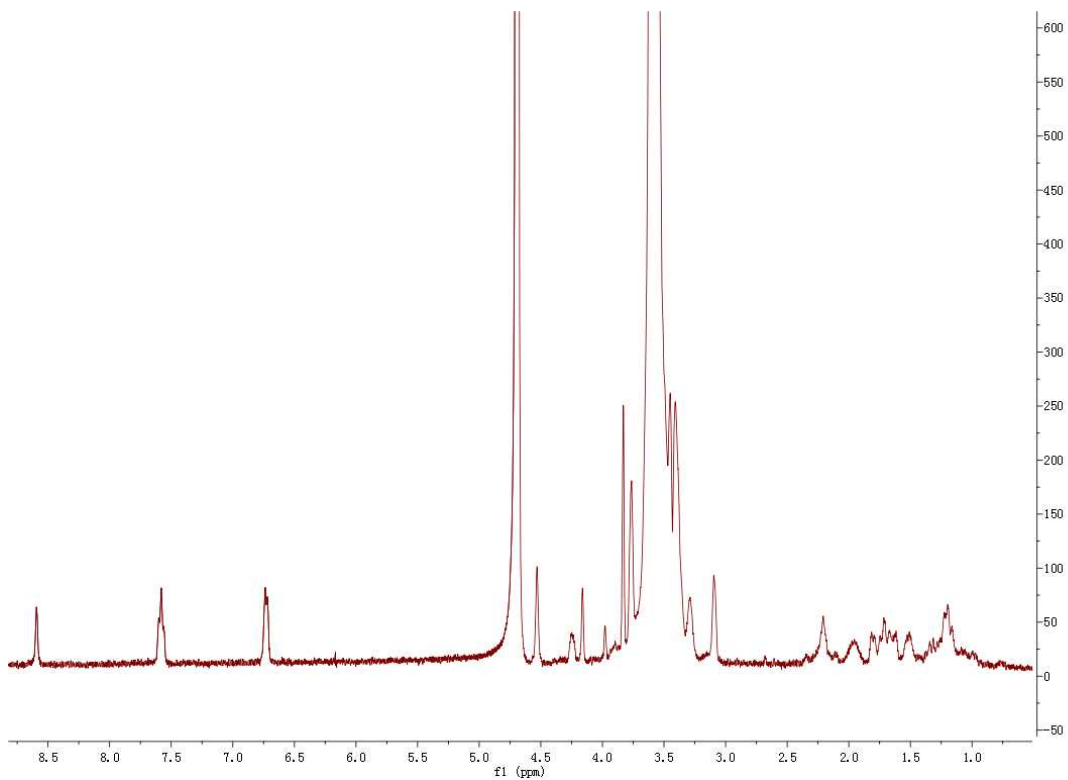

Fig. S2 Molecular formula and <sup>1</sup>H-NMR spectra of Folate-PEG-COOH in D<sub>2</sub>O.

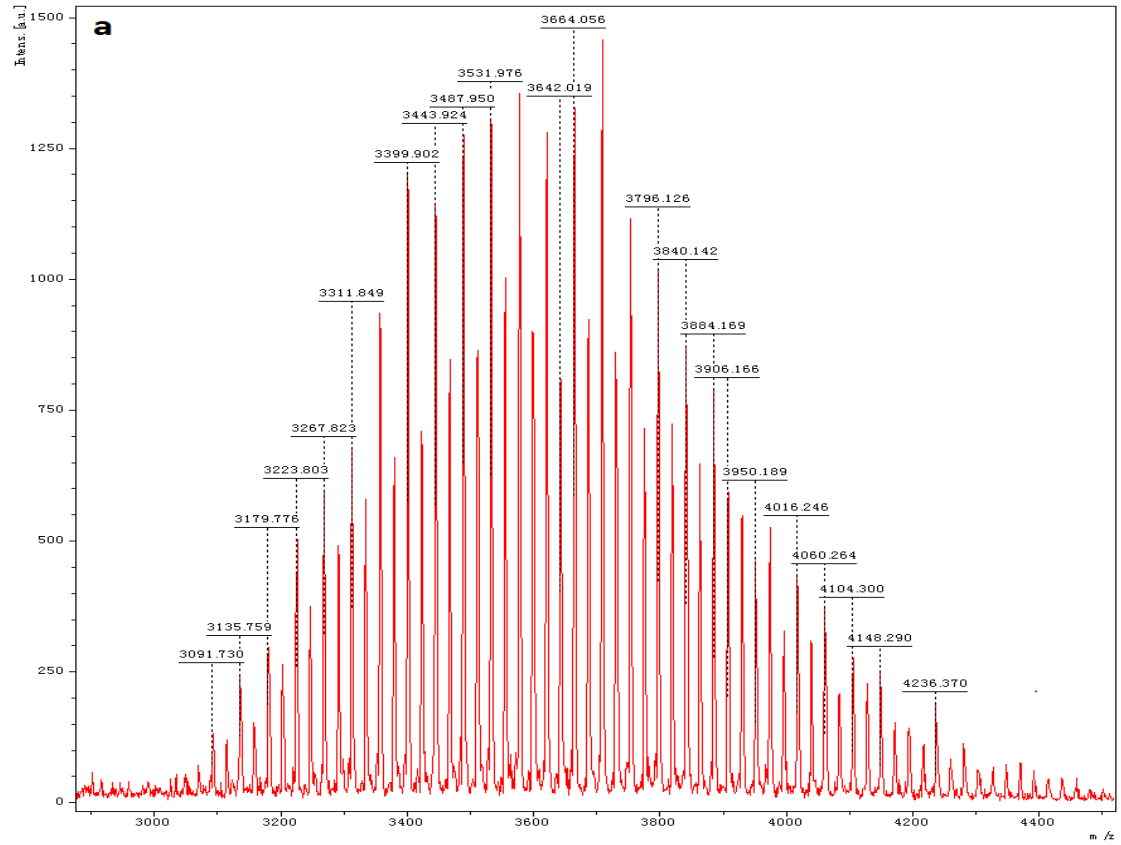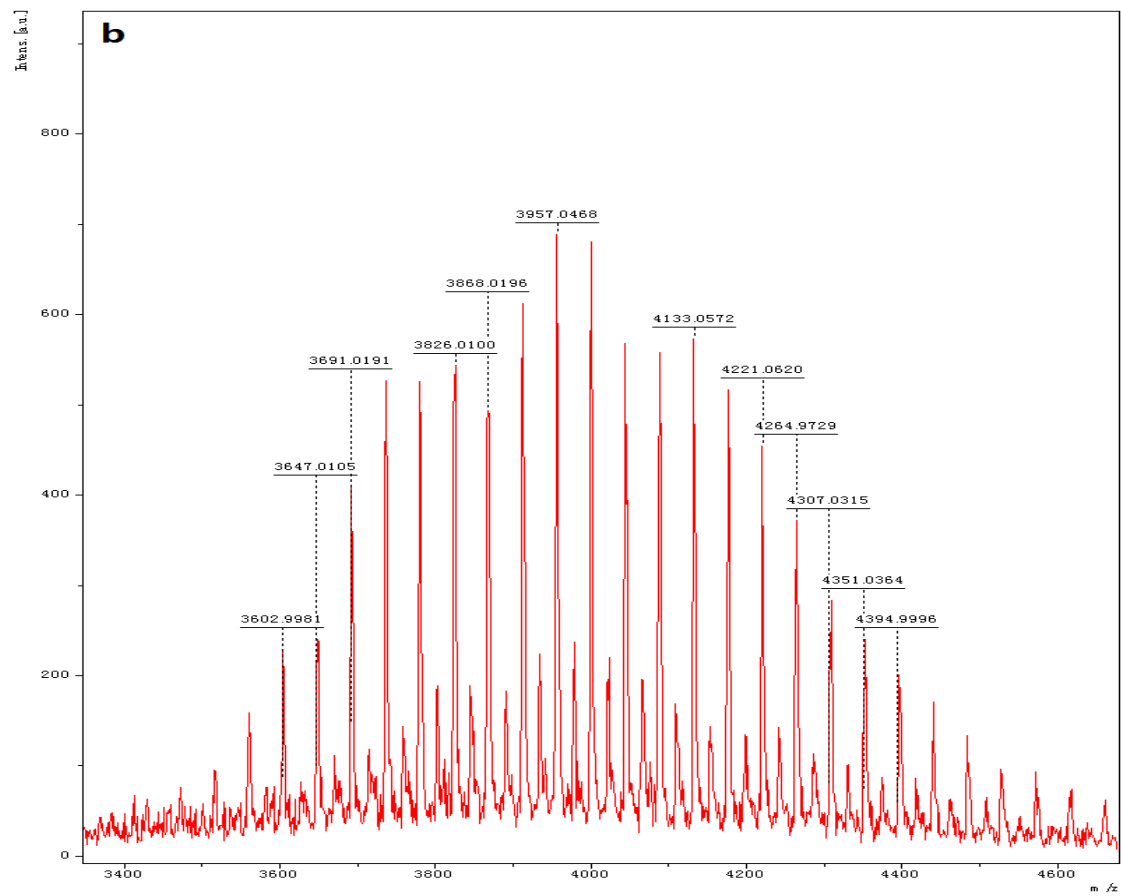

Fig. 3 Mass spectra of  $\text{NH}_2\text{-PEG-COOH}$  (a) and Folate-PEG-COOH (b).
